# Supplementary material
Source: PubMed Central journal article supplement (PMC2667072)
Supplement: 0811231106_0811231106SI.pdf [file 0811231106_0811231106SI.pdf]

# Supporting Information

Lee et al. 10.1073/pnas.0811231106

## SI Text

**Solubilization of the Partially Denatured Insulin  $\beta$ -Chain by Complex Formation with AtTDX.** Various concentrations of AtTDX were incubated with 30  $\mu$ M bovine insulin and 0.5 mM DTT in 50 mM Hepes-KOH (pH 8.0) buffer. The incubation mixture was centrifuged at 25,000  $\times g$  at 4°C for 20 min. The soluble supernatants were separated on nonreducing SDS/PAGE gels, and subjected to silver staining.

**Preparation of Truncated AtTDX Mutant Proteins for the Oligomeric Status/Function Analysis.** To identify the domains responsible for AtTDX's multiple functions, a number of truncated DNA constructs were prepared by using PCR and expressed in *E. coli*. To analyze the role of Cys residues in the AtTDX protein, we replaced both Cys residues of AtTDX in the Trx motif with Ser (C304S, C307S, and a double mutant C304/307S). Although most of the AtTDX mutant proteins were highly expressed and homogeneously purified from *E. coli* (Fig. S6B), the truncated proteins containing amino acids 1–217, 218–380, and 112–380 were pelleted as inclusion bodies and were not included in the analyses.

**Chlorophyll Content and Fluorescence Measurements.** Thermotolerance of the WT *Arabidopsis* and representative T<sub>3</sub> lines of transgenic *Arabidopsis* plants overexpressing AtTDX (OE) and the AtTDX C304/307S mutant (C304/307S), or suppressing endogenous AtTDX protein (Sup) were analyzed by measuring the chlorophyll content and chlorophyll fluorescence. For the experiment, 4-week-old *Arabidopsis* seedlings were heat-treated at 38 °C for 5 days, transferred to their optimal growing conditions (22 °C), and then grown for an additional 5 days (recovery period), as outlined in Fig. 5C Upper. During the recovery period, changes in the chlorophyll quantity and chlorophyll fluorescence were examined in leaves. Chlorophyll was extracted by using 80% (vol/vol) acetone and then measured as described (1, 2). The chlorophyll fluorescence (quantum yield of PSII, Fv/Fm) was measured with a portable fluorometer (Handy PEA; Hansatech). The leaves were dark-adapted for 10 min before the measurement as described (3). At least 3 leaves from each plant line were analyzed, and the Fv/Fm ratio was estimated as described (4).

1. Arnon DI (1949) Copper enzymes in isolated chloroplasts. Polyphenoloxidase in *Beta Vulgaris*. *Plant Physiol* 24:1–15.
2. Porra RJ, Thompson WA, Kriedemann PE (1989) Determination of accurate extinction coefficients and simultaneous equations for assaying chlorophyll a and b extracted with four different solvents: Verification of the concentration of chlorophyll standards by atomic absorption spectroscopy. *Biochem Biophys Acta* 975:384–394.
3. Shahbazi M, Gilbert M, Labouré AM, Kuntz M (2007) Dual role of the plastid terminal oxidase in tomato. *Plant Physiol* 145:691–702.
4. Kang D-J, et al. (2005) Jasmonic acid differentially affects growth, ion uptake, and abscisic acid concentration in salt-tolerant and salt-sensitive rice cultivars. *J Agron Crop Sci* 191:273–282.





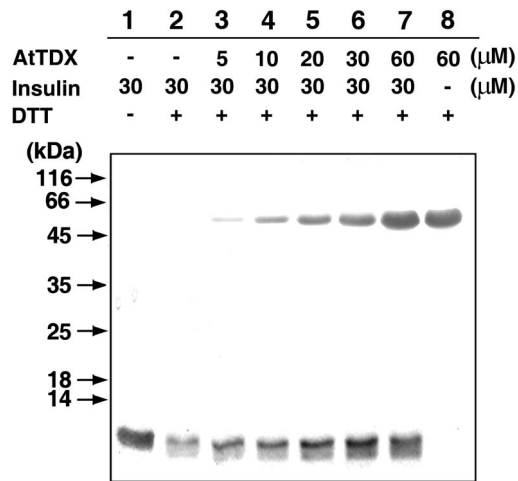

**Fig. S3.** Solubilization of the reduced and partially-denatured insulin  $\beta$ -chain by complex formation with AtTDX. Various concentrations of AtTDX were incubated with 30  $\mu\text{M}$  insulin in the absence (–) or presence (+) of 0.5 mM DTT at room temperature for 25 min. After centrifuging the reaction mixture ( $25,000 \times g$ , 20 min), the soluble supernatant proteins were subjected to 15% reducing SDS/PAGE, followed by silver staining, which showed that the solubility of the DTT-mediated reduced and partially-denatured  $\beta$ -chain of insulin is proportionally increased by increasing the concentration of AtTDX in the reaction mixture.

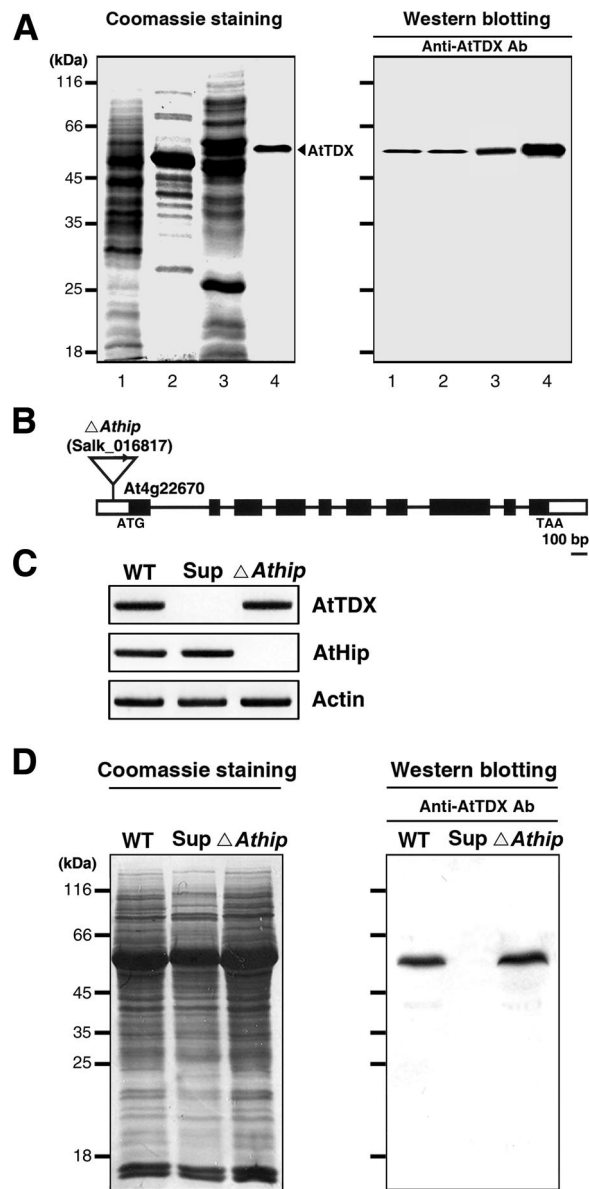

**Fig. S4.** Immuno-specificity of the anti-AtTDX antibody. (A) Soluble proteins (50  $\mu$ g) extracted from *Arabidopsis* seedlings grown for 4 weeks (lane 1), *Arabidopsis* suspension cells (lane 2), *E. coli* cells overexpressing AtTDX (lane 3), and purified recombinant AtTDX (1  $\mu$ g) (lane 4) were separated on a 12% reducing SDS/PAGE gel and stained with Coomassie brilliant blue (Coomassie staining). Proteins resolved by SDS/PAGE were transferred onto a nitrocellulose membrane for Western blot analysis and probed with a 1:20,000 (vol/vol) dilution of a polyclonal antibody raised against AtTDX by using the alkaline phosphatase assay, which resulted in a specific immune-reaction of the antibody with AtTDX. (B–D) Antibody specificity of AtTDX was analyzed by using WT *Arabidopsis*, a transgenic *Arabidopsis* line suppressing AtTDX (Sup), and a T-DNA insertion  $\Delta Athip$  knockout line of *Arabidopsis* (Salk line 016817). (B) Position of the T-DNA insertion site in AtHIP genomic DNA. The AtHIP genomic cDNA includes 10 exons (black boxes), 9 introns (bold lines between black boxes) and untranslated regions (UTR: white boxes). ATG, initiation codon; TAA, stop codon. (C) Expression levels of the mRNAs encoding AtTDX and AtHIP were gauged by RT-PCR in WT *Arabidopsis*, transgenic *Arabidopsis* suppressing AtTDX (Sup), and the *Arabidopsis* T-DNA insertion knockout mutant  $\Delta Athip$ . (D) After extracting the cytosolic fractions from the *Arabidopsis* plants, they were separated on 12% SDS/PAGE gels and subjected to either Coomassie blue staining (Left) or Western blot analysis (Right) with an anti-AtTDX antibody. The anti-AtTDX antibody immuno-reacted specifically with AtTDX.

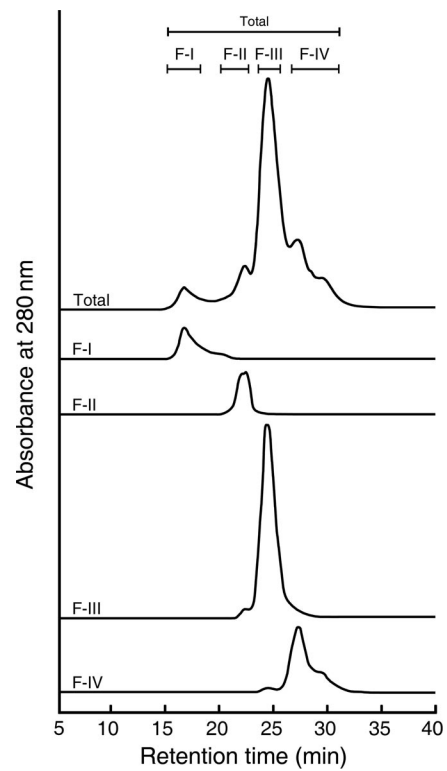

**Fig. S5.** Rechromatography of the four AtTDX protein fractions (F-I–F-IV) separated by SEC. The SEC-separated protein fractions (F-I–F-IV) of AtTDX were concentrated and rechromatographed by SEC under the same conditions as in Fig. 2A. The functional activity of each fraction was characterized.



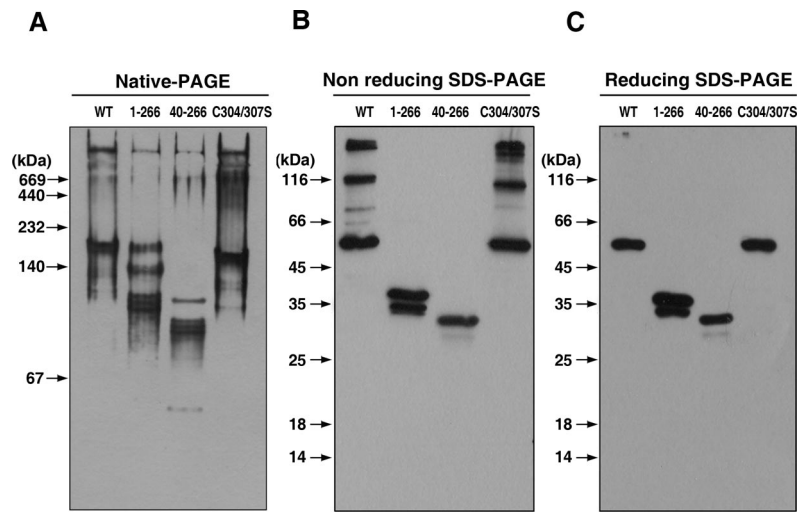

**Fig. S7.** Oligomerization status of native AtTDX (WT), truncated forms of AtTDX (residues 1–266 and 40–266), and Cys mutant AtTDX (C304/307S) presented in Fig. S6 analyzed by Western blotting. Purified proteins of native AtTDX (WT), various forms of truncated mutant AtTDX (residues 1–266 and 40–266), and Cys mutant AtTDX (C304/307S) were separated on 10% native-PAGE (A), 12% nonreducing SDS/PAGE (B), and reducing SDS/PAGE (C) gels and subjected to Western blot analysis with an anti-AtTDX antibody. The oligomerization status of the proteins was compared under the various PAGE conditions.



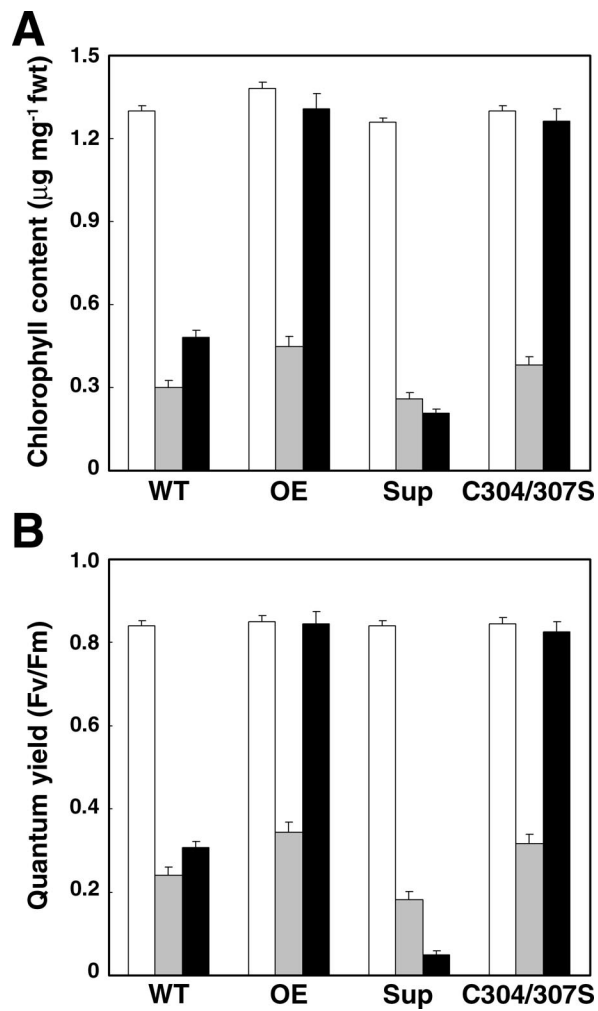

**Fig. 5B.** Photosynthetic parameters of transgenic *Arabidopsis* plants during the recovery period from heat shock. Four-week-old  $T_3$  homozygous lines of *Arabidopsis* grown at 22°C, including the WT, an AtTDX overexpression line (OE), an AtTDX suppression line (Sup), and a Cys-mutant-AtTDX overexpression line (C304/307S), were heat-stressed at 38 °C for 5 days and then restored to their optimal growing conditions (22 °C), as outlined in Fig. 5C Upper. During the heat shock and recovery periods, changes of total chlorophyll content (A) and steady-state quantum yield (B) were measured. The photosynthetic parameters of *Arabidopsis* plants grown at 22 °C (white bar; indicated by white box in Fig. 5C) were compared with those of plants heat-stressed at 38 °C for 5 days (gray bar; indicated by white box in Fig. 5C), and plants were allowed to recover from heat shock for 5 days at optimum growing conditions (22 °C) (black bar; indicated by white box in Fig. 5C).
